# Supplementary material for: N-Acetyl-l-cysteine modulates the metabolism of cis-platin in human plasma in vitro
Source: Royal Society of Chemistry journal article supplement (doi:10.1039/c3mt00012e), 2013-01-01
Supplement: c3mt00012e.pdf [file c3mt00012e.pdf]

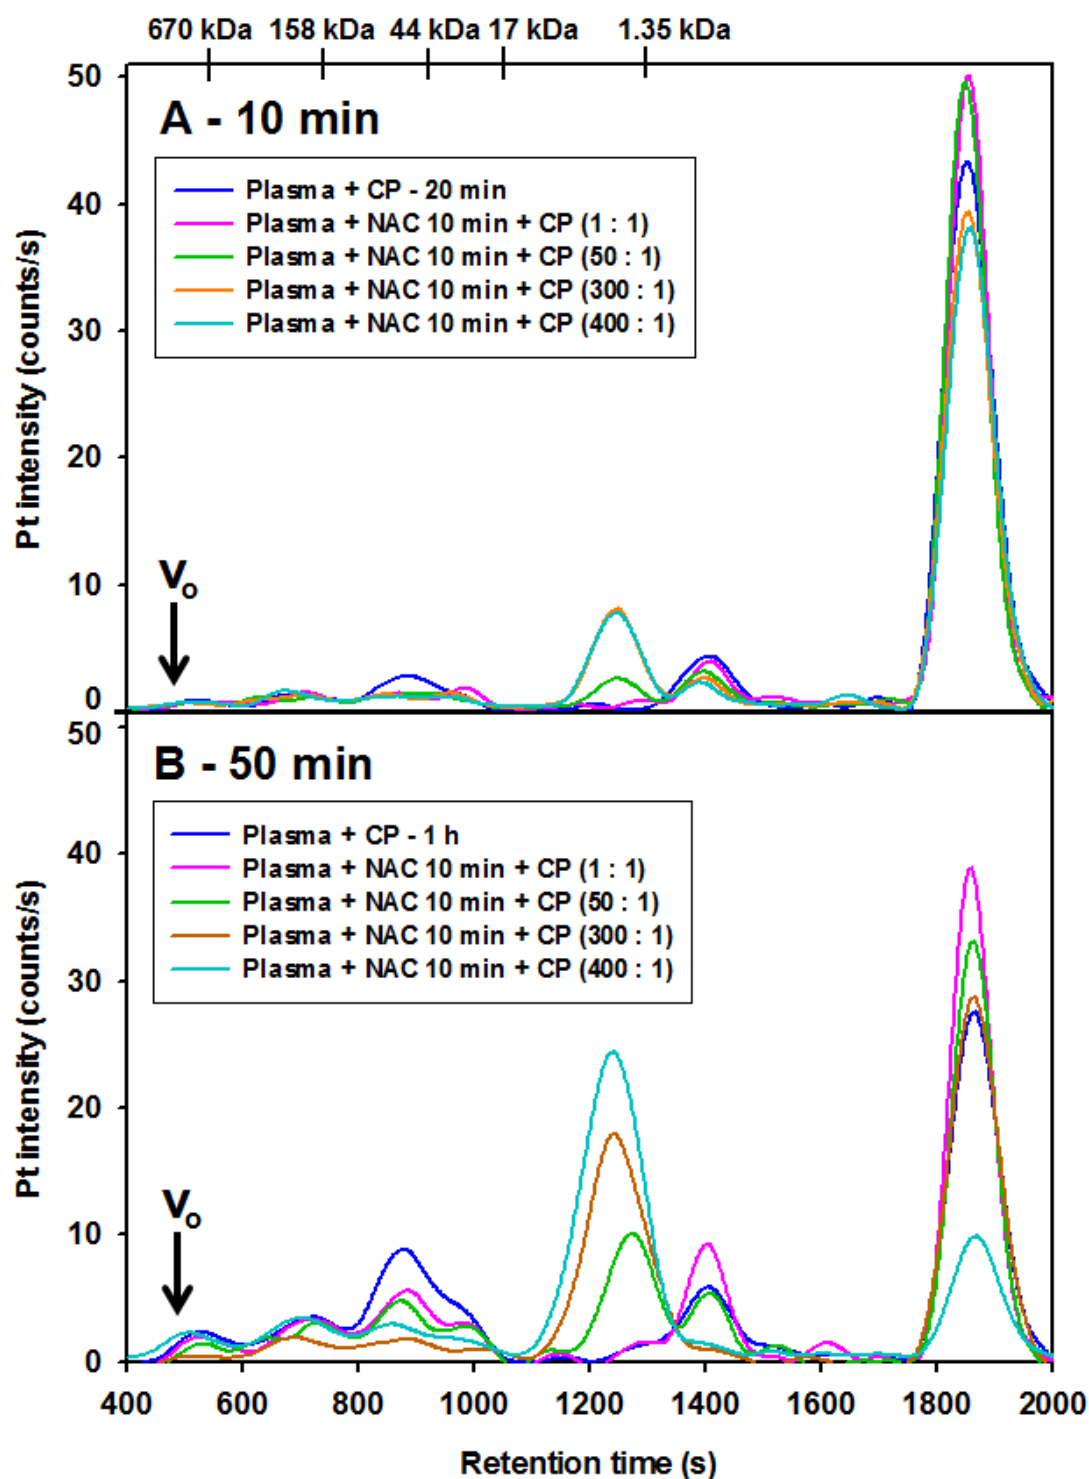

Fig. S1

Representative Pt-specific chromatograms obtained after the addition of N-acetyl-L-cysteine (NAC) to human plasma incubated for 10 min (37 °C). Subsequently cis-platin (CP) was added and the obtained mixtures were analyzed by SEC-ICP-AES after 10 min (A) and 50 min (B). The molar ratio of NAC : CP was varied from 1 : 1, 50 : 1, 300 : 1 and 400 : 1. A control experiment involved the addition of CP to human plasma followed by the analysis with SEC-ICP-AES after 20 min and 1 h (dark blue line). Stationary phase: Superdex 200 10/300 GL (30 × 1.0 cm I.D., 13 mm particle size) SEC column at 22 °C; mobile phase: PBS buffer (0.15 M, pH 7.4); flow rate: 1.0 mL min<sup>-1</sup>, injection volume: 500 μL; detector: ICP-AES at 214.423 nm (Pt). The retention times of the molecular markers are depicted on top of the figure.
